# Supplementary material for: Genome-Wide Association Study of Grain Size Traits in Indica Rice Multiparent Advanced Generation Intercross (MAGIC) Population
Source: PubMed Central journal article supplement (PMC7193545; doi:10.3389/fpls.2020.00395), 2020-04-24
Supplement: Data_Sheet_2.pdf [file Data_Sheet_2.pdf]

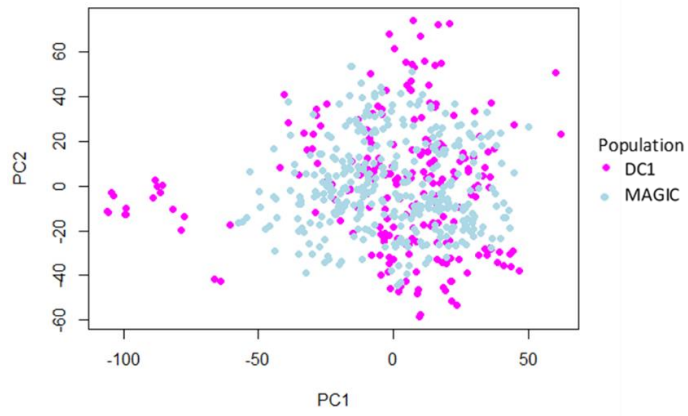

Supplementary Figure 1 Population structure of DC1 and 8-way populations based on PCA.

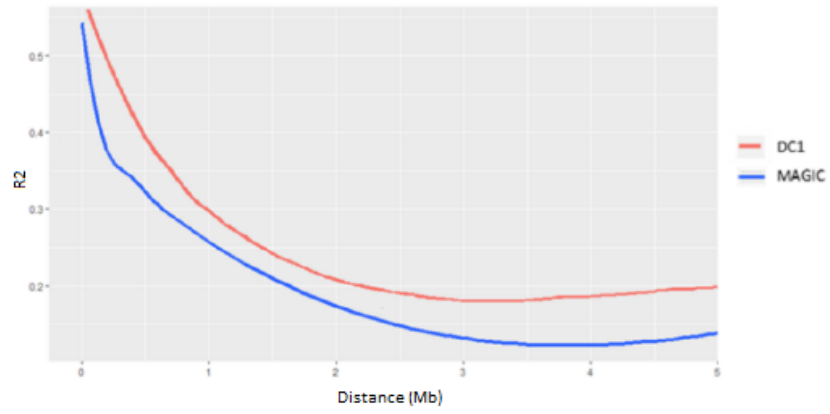

Supplementary Figure 2 Whole genome linkage disequilibrium decay of DC1 and 8-way populations.

(A)  
GS3

(A)

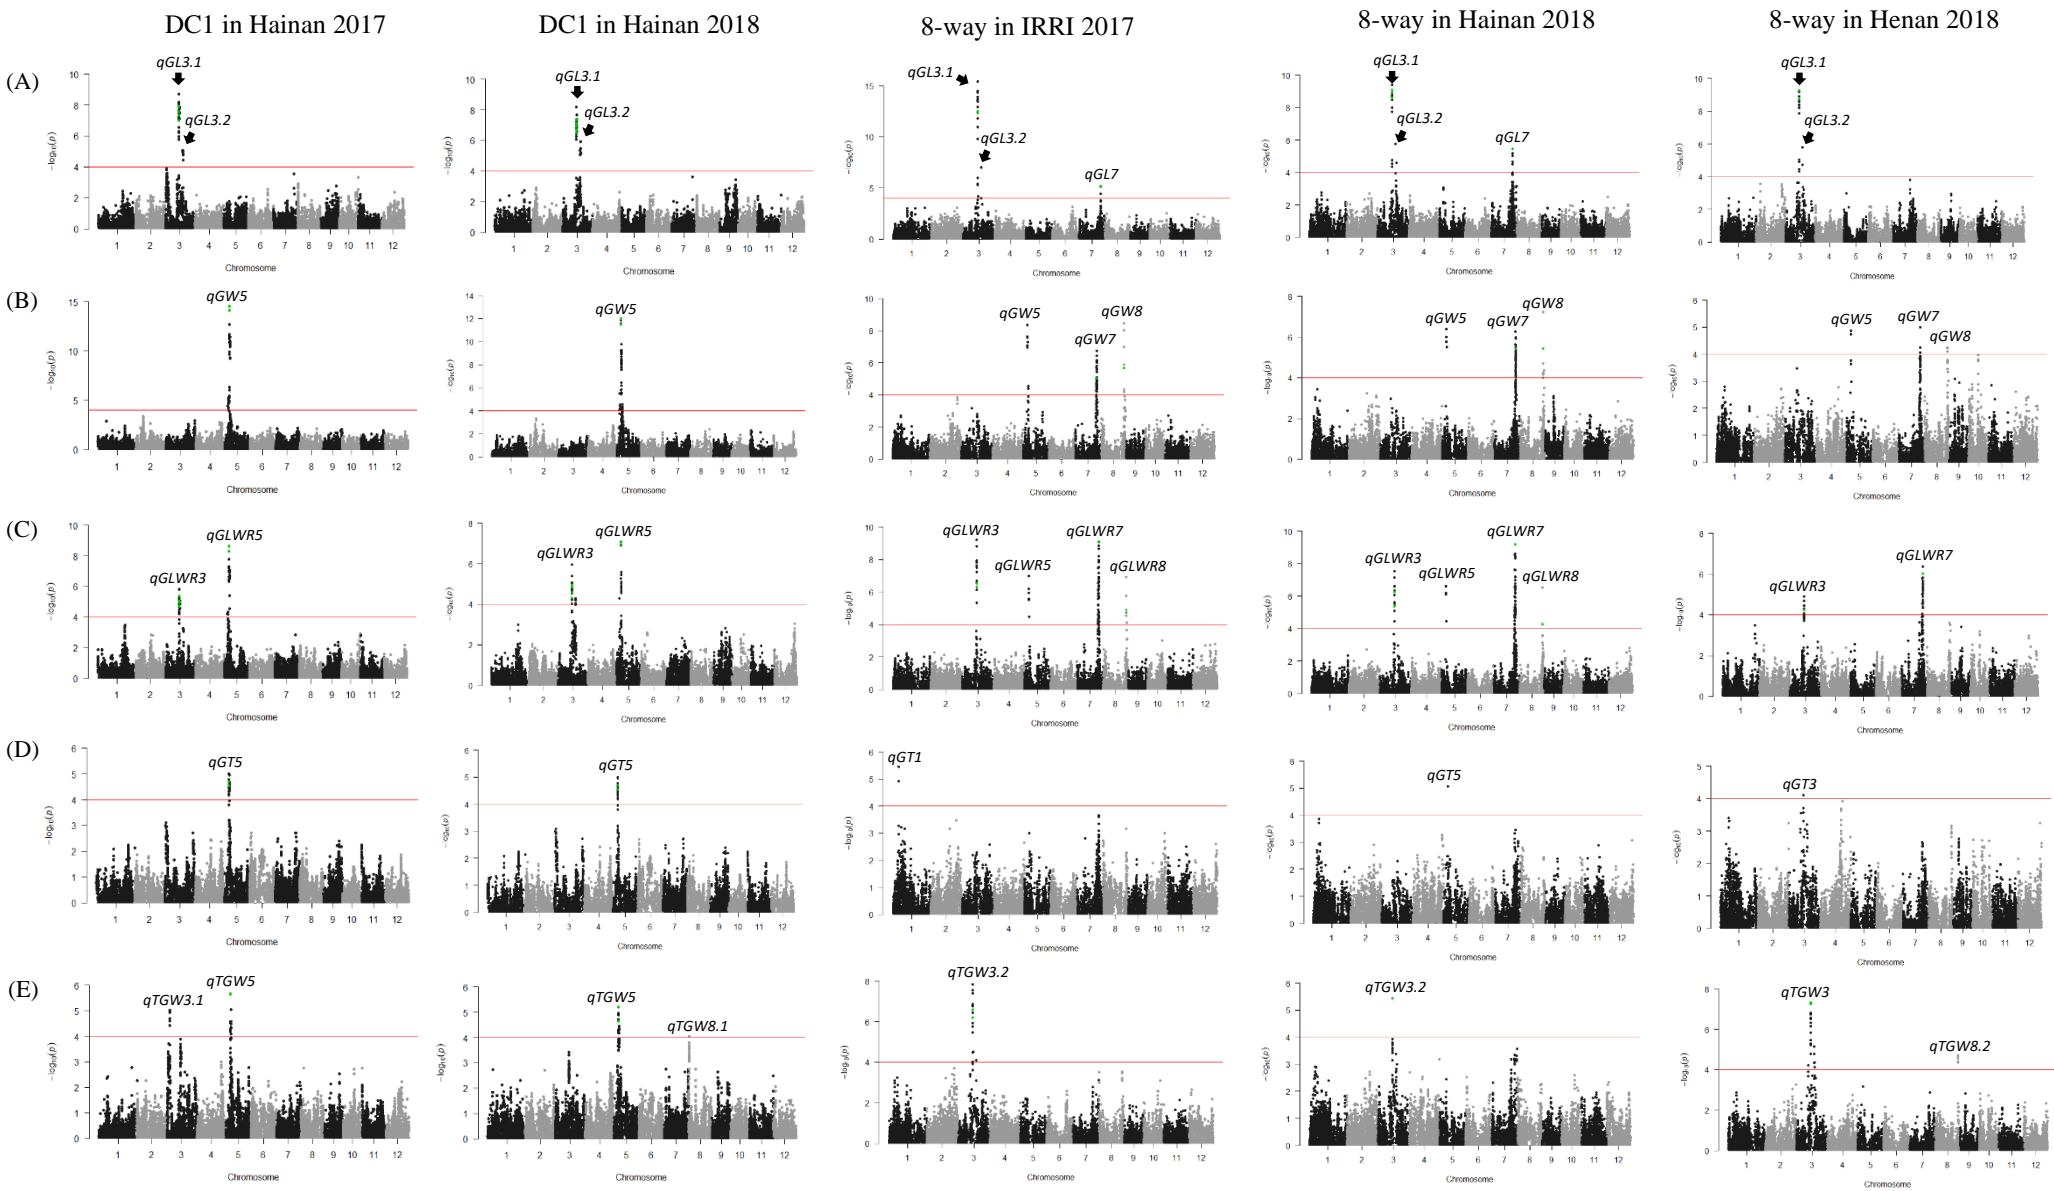

Supplementary Figure 3 Genome-wide Manhattan plots for (A) Grain length, (B) grain width, (C) grain length-width ratio, (D) grain thickness, and (E) thousand grain weight in DC1 and 8-way measured in different environments and across years. Dots in green color corresponds to SNPs of previously cloned genes (*GS3*, *GW5/qSW5*, *GL7/GW7/SLG7*, and *GW8/OsSPL16* on chromosomes 3, 5, 7 and 8, respectively).

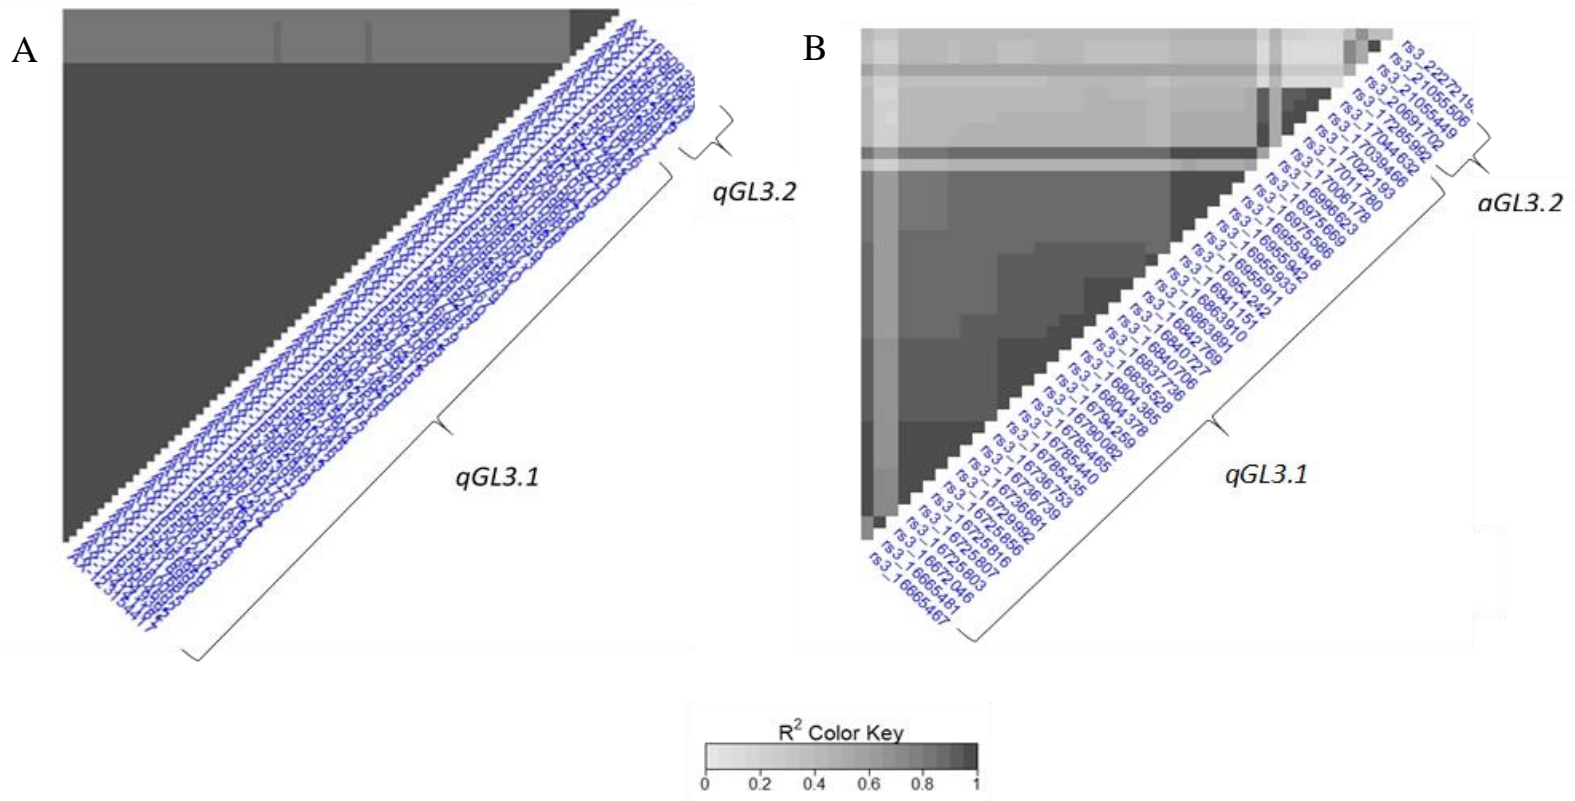

Supplementary Figure 4 LD blocks for *qGL3.1* and *qGL3.2* detected in (A) DC1 and (B) 8-way populations.
